# Supplementary material for: Reliable protein–protein docking with AlphaFold, Rosetta, and replica exchange
Source: eLife. 2025 May 27;13:RP94029. doi: 10.7554/eLife.94029 (PMC12113263; doi:10.7554/eLife.94029)
Supplement: Figure 5—source data 1. [file elife-94029-fig5-data1.xlsx]

## Sheet: Sheet1
PDB	Interface RMSD		fnat		CAPRI Rank		Flexibility
	AF2	AlphaRED	AF2	AlphaRED	AF2	AlphaRED
1ACB	2.51	2.02	0.86	0.85	1	1	Difficult
1ATN	1.35	1.29	0.87	0.89	2	2	Difficult
1BKD	1.64	1.48	0.84	0.83	2	2	Difficult
1DE4	4.43	5.91	0.37	0.12	0	0	Difficult
1E4K	16.83	5.11	0.03	0.09	0	0	Difficult
1EER	1.75	1.64	0.8	0.81	2	2	Difficult
1F6M	2.76	2.75	0.5	0.56	1	1	Difficult
1FAK	1.71	1.91	0.71	0.71	2	2	Difficult
1FQ1	4.06	3.24	0.5	0.56	0	1	Difficult
1H1V	3.61	3.63	0.22	0.22	1	1	Difficult
1IBR	1.34	1.31	0.79	0.89	2	2	Difficult
1IRA	2.76	2.42	0.52	0.62	1	1	Difficult
1JK9	1.7	1.64	0.79	0.87	2	2	Difficult
1JM0	4.1	3.69	0.72	0.82	0	1	Difficult
1JZD	17.62	17.6	0	0	0	0	Difficult
1PXV	1.3	1.37	0.89	0.91	2	2	Difficult
1R8S	2.12	2.06	0.74	0.75	1	1	Difficult
1RKE	4.31	4.12	0.57	0.64	0	0	Difficult
1Y64	7.44	6.93	0.4	0.35	0	0	Difficult
1ZLI	1.84	1.79	0.86	0.88	2	2	Difficult
2C0L	1.36	1.21	0.89	0.9	2	2	Difficult
2FJG	17.03	5.65	0.02	0.07	0	0	Difficult
2I9B	3.98	3.03	0.59	0.66	1	1	Difficult
2J7P	2.74	2.76	0.38	0.43	1	1	Difficult
2O3B	1.27	1.29	0.73	0.81	2	2	Difficult
2O3B	1.16	1.16	0.81	0.85	2	2	Difficult
2OT3	1.97	2.01	0.69	0.7	2	1	Difficult
3AAD	22.37	21.03	0	0	0	0	Difficult
3AAD	21.6	21.48	0	0	0	0	Difficult
3F1P	16.89	12.14	0	0	0	0	Difficult
3FN1	1.93	1.94	0.75	0.77	2	2	Difficult
3H11	5.89	6	0.35	0.55	0	0	Difficult
4DW2	18.37	7	0	0.02	0	0	Difficult
4GAM	28.34	28.11	0	0	0	0	Difficult
5C7X	3.76	2.8	0.23	0.48	1	1	Difficult
1B6C	5.3	4.24	0.39	0.31	0	0	Medium
1CGI	1.66	1.63	0.86	0.86	2	2	Medium
1FC2	1.96	1.87	0.84	0.88	2	2	Medium
1GP2	2.33	1.93	0.48	0.55	1	2	Medium
1GRN	1.8	1.72	0.78	0.76	2	2	Medium
1HE8	3.48	3.42	0.77	0.77	1	1	Medium
1I2M	3.03	3.1	0.74	0.66	1	1	Medium
1IB1	17.08	5.07	0	0.22	0	0	Medium
1IJK	5.18	5.23	0.78	0.72	0	0	Medium
1JIW	1.53	1.41	0.63	0.75	2	2	Medium
1K5D	1.55	1.57	0.75	0.75	2	2	Medium
1KKL	20.46	17.77	0.02	0	0	0	Medium
1LFD	1	1.07	0.88	0.94	2	2	Medium
1M10	4.4	5.4	0.27	0.33	0	0	Medium
1MQ8	1.97	1.58	0.73	0.94	2	2	Medium
1NW9	13.89	4.93	0	0.34	0	0	Medium
1R6Q	1.06	1.02	0.94	0.89	2	2	Medium
1SYX	1.22	1.17	0.79	0.9	2	2	Medium
1WQ1	1.54	1.45	0.68	0.79	2	2	Medium
1XQS	1.91	1.71	0.75	0.87	2	2	Medium
1ZM4	2.59	2.56	0.63	0.68	1	1	Medium
2CFH	3.09	2.89	0.75	0.63	0	1	Medium
2DD8	13.56	1.7	0	0.78	0	2	Medium
2H7V	2.26	2.55	0.68	0.73	1	1	Medium
2HRK	0.99	0.96	0.94	0.91	3	3	Medium
2NZ8	1.14	1.02	0.86	0.92	2	2	Medium
2OZA	13.24	8.2	0	0.17	0	0	Medium
2Z0E	1.25	1.37	0.93	0.93	2	2	Medium
3AAA	1.33	1.32	0.77	0.94	2	2	Medium
3AAD	22.37	15.42	0	0	0	0	Medium
3BX7	2.11	2.08	0.63	0.65	1	1	Medium
3CPH	5.63	4.09	0.14	0.21	0	0	Medium
3DAW	1.31	1.26	0.84	0.84	2	2	Medium
3EO1	21.58	3.63	0	0.33	0	1	Medium
3G6D	15.14	13.94	0	0	0	0	Medium
3HI6	4.89	4.52	0.17	0.26	0	0	Medium
3L5W	14.9	11.63	0	0	0	0	Medium
3R9A	19.05	4.63	0	0.18	0	0	Medium
3RJQ	9.77	4.75	0	0.21	0	0	Medium
3S9D	1.73	1.36	0.42	0.79	2	2	Medium
3SZK	14.92	7.4	0	0	0	0	Medium
3V6Z	17.17	6.25	0	0.06	0	0	Medium
4ETQ	20.17	5.91	0	0.15	0	0	Medium
4FZA	2.36	2.08	0.8	0.85	1	1	Medium
4IZ7	1.88	1.94	0.72	0.75	2	2	Medium
4JCV	20.06	11.8	0	0.02	0	0	Medium
4LW4	3.03	3.63	0.67	0.33	1	1	Medium
4M3K	16.13	2.06	0	0.46	0	1	Medium
4POU	13.79	2.43	0	0.51	0	1	Medium
5CBA	2.43	2.42	0.82	0.82	1	1	Medium
5E5M	5.26	3.15	0.04	0.4	0	1	Medium
5HGG	4.85	3.38	0.25	0.21	0	1	Medium
5HYS	16.42	9.16	0	0	0	0	Medium
5KOV	16.97	7.21	0	0.19	0	0	Medium
5VNW	29.75	2.58	0	0.42	0	0	Medium
5WHK	2.66	2.55	0.57	0.67	0	1	Medium
6A0Z	13.99	4.87	0.1	0.18	0	0	Medium
6AL0	3.09	2.78	0.44	0.52	0	1	Medium
6EY6	14.81	12.61	0.14	0.15	0	0	Medium
1A2K	24.77	5.79	0	0.14	0	0	Rigid
1AHW	1.93	1.41	0.54	0.79	2	2	Rigid
1AK4	7.37	7.37	0.17	0.23	0	0	Rigid
1AKJ	1.65	1.78	0.75	0.72	2	2	Rigid
1AVX	1.42	1.65	0.94	0.92	2	2	Rigid
1AY7	0.78	0.77	0.91	0.91	3	3	Rigid
1AZS	2.9	2.8	0.66	0.66	1	1	Rigid
1BUH	1.38	1.3	0.77	0.74	2	2	Rigid
1BVN	1.44	1.13	0.65	0.86	2	2	Rigid
1CLV	8.57	4.95	0.07	0.2	0	0	Rigid
1D6R	1.07	1.09	0.9	0.84	2	2	Rigid
1DFJ	1.45	1.57	0.77	0.83	2	2	Rigid
1DQJ	7.43	5.15	0.03	0.15	0	0	Rigid
1E6E	1.97	1.89	0.85	0.8	2	2	Rigid
1E6J	14.57	12.09	0	0.03	0	0	Rigid
1E96	1.49	1.23	0.86	0.92	2	2	Rigid
1EAW	1.11	1.19	0.78	0.81	2	2	Rigid
1EFN	15.08	3.34	0	0.33	0	1	Rigid
1EWY	5.7	4.6	0.06	0.11	0	0	Rigid
1EXB	23.79	19.64	0	0.05	0	0	Rigid
1EZU	25.5	12.81	0	0.01	0	0	Rigid
1F34	1.94	1.94	0.73	0.71	2	2	Rigid
1F51	19.73	19.91	0	0	0	0	Rigid
1FCC	27.07	1.76	0	0.74	0	2	Rigid
1FFW	1.41	1.28	0.86	0.96	2	2	Rigid
1FLE	1.52	1.46	0.81	0.91	2	2	Rigid
1FQJ	2.2	2.3	0.74	0.76	1	1	Rigid
1GCQ	14.19	4.55	0	0.15	0	0	Rigid
1GHQ	13.1	12.54	0	0	0	0	Rigid
1GL1	0.8	0.94	0.9	0.87	3	3	Rigid
1GLA	4.12	3.1	0.22	0.3	0	1	Rigid
1GPW	1.45	1.38	0.89	0.87	2	2	Rigid
1GXD	25.92	3.05	0	0.51	0	1	Rigid
1H9D	1.57	1.46	0.84	0.89	2	2	Rigid
1HCF	14.46	14.56	0	0	0	0	Rigid
1HE1	1.8	1.73	0.78	0.82	2	2	Rigid
1HIA	1.19	1.23	0.87	0.95	2	2	Rigid
1I4D	20.11	6.39	0	0.16	0	0	Rigid
1J2J	1.21	1.18	0.88	0.92	2	2	Rigid
1JPS	16.85	11.19	0.02	0.04	0	0	Rigid
1JTD	1.15	0.94	0.75	0.83	2	3	Rigid
1JTG	2.59	2.1	0.6	0.6	1	1	Rigid
1JWH	1.78	1.63	0.86	0.83	2	2	Rigid
1K74	1.75	1.78	0.87	0.87	2	2	Rigid
1KAC	18.09	3.05	0	0.34	0	1	Rigid
1KLU	13.54	3.04	0	0.56	0	1	Rigid
1KTZ	1.06	1.06	0.89	0.93	2	2	Rigid
1KXP	1.17	1.17	0.85	0.83	2	2	Rigid
1M27	8.25	1.9	0.15	0.9	0	2	Rigid
1MAH	1.42	1.42	0.78	0.79	2	2	Rigid
1ML0	19.64	17.41	0	0.02	0	0	Rigid
1MLC	10.89	3.99	0	0.15	0	1	Rigid
1OC0	1.11	1.31	0.94	0.85	2	2	Rigid
1OFU	1.34	1.28	0.94	0.94	2	2	Rigid
1OPH	2.11	1.48	0.82	0.86	1	2	Rigid
1OYV	8.29	6.34	0.68	0.78	0	0	Rigid
1PPE	2	1.88	0.82	0.82	2	2	Rigid
1PVH	18.12	2.88	0	0.35	0	1	Rigid
1QA9	1.76	1.63	0.64	0.77	2	2	Rigid
1R0R	0.86	0.89	0.91	0.93	3	3	Rigid
1RLB	19.55	19.32	0	0	0	0	Rigid
1RV6	23.47	22.98	0	0	0	0	Rigid
1S1Q	14.25	2.42	0	0.49	0	1	Rigid
1S78	27.14	10.5	0	0.06	0	0	Rigid
1SBB	25.69	3.49	0	0.41	0	1	Rigid
1T6B	12.23	7.85	0.02	0.2	0	0	Rigid
1TMQ	12.66	12.73	0.05	0.08	0	0	Rigid
1UDI	1.23	1.16	0.77	0.92	2	2	Rigid
1US7	0.76	0.76	0.93	0.94	0	3	Rigid
1VFB	13.92	2.07	0	0.61	0	1	Rigid
1WDW	35.72	35.36	0	0	0	0	Rigid
1WEJ	16.95	9.41	0	0.07	0	0	Rigid
1XD3	1.72	1.71	0.94	0.89	2	2	Rigid
1XU1	13.59	13.07	0	0	0	0	Rigid
1YVB	1.14	1.12	0.83	0.87	2	2	Rigid
1Z0K	1.75	1.53	0.65	0.81	2	2	Rigid
1Z5Y	2.12	2.12	0.81	0.86	1	1	Rigid
1ZHH	16.31	16.53	0	0	0	0	Rigid
1ZHI	1.06	1.22	0.94	0.91	2	2	Rigid
2A1A	1.88	1.95	0.84	0.75	2	2	Rigid
2A5T	1.48	1.42	0.83	0.85	2	2	Rigid
2A9K	16.93	4.29	0	0.31	0	0	Rigid
2ABZ	8.93	6.97	0.08	0.1	0	0	Rigid
2AJF	16.7	5	0	0.22	0	0	Rigid
2AYO	2.1	2.11	0.68	0.57	1	1	Rigid
2B42	1.22	1.21	0.82	0.87	2	2	Rigid
2B4J	18.53	3.72	0	0.26	0	1	Rigid
2BTF	1.15	1.11	0.82	0.85	2	2	Rigid
2FD6	16.35	12.52	0	0.03	0	0	Rigid
2FJU	31.69	2.15	0	0.59	0	1	Rigid
2G77	1.87	2.16	0.75	0.52	2	1	Rigid
2GAF	2.45	2.94	0.53	0.44	1	1	Rigid
2GTP	1	0.96	0.79	0.9	3	3	Rigid
2HLE	2.18	1.92	0.64	0.79	1	2	Rigid
2HQS	2.49	2.38	0.56	0.6	1	1	Rigid
2I25	7.45	2.7	0.11	0.36	0	1	Rigid
2J0T	1.15	1.16	0.95	0.95	2	2	Rigid
2MTA	22.03	20.25	0	0	0	0	Rigid
2O8V	7.93	7.29	0.2	0.47	0	1	Rigid
2OOB	9.07	2.22	0	0.55	0	1	Rigid
2OOR	19.99	19.61	0	0	0	0	Rigid
2OUL	0.86	0.85	0.94	0.93	3	3	Rigid
2PCC	1.28	1.47	0.9	0.85	2	2	Rigid
2SIC	0.94	0.89	0.88	0.91	3	3	Rigid
2SNI	1.03	0.99	0.84	0.89	2	3	Rigid
2UUY	1.01	0.96	0.9	0.94	3	3	Rigid
2VDB	0.94	0.86	0.83	0.89	2	2	Rigid
2VIS	12.94	7.07	0	0.02	0	0	Rigid
2VXT	2.2	2.14	0.82	0.86	1	1	Rigid
2W9E	13.91	2.27	0	0.62	0	1	Rigid
2X9A	0.98	0.94	0.89	0.89	3	3	Rigid
2YVJ	3.74	1.65	0.1	0.45	1	2	Rigid
3A4S	1.64	1.68	0.85	0.9	2	2	Rigid
3BIW	11.77	10.32	0.1	0.1	0	0	Rigid
3BP8	32.31	4.38	0	0.44	0	0	Rigid
3D5S	1.85	1.67	0.73	0.76	2	2	Rigid
3EOA	17.43	11.54	0	0.09	0	0	Rigid
3H2V	6.98	2.07	0	0.63	0	1	Rigid
3HMX	19.54	11.61	0	0.03	0	0	Rigid
3K75	1.2	1.12	0.89	0.92	2	2	Rigid
3LVK	2.26	1.76	0.55	0.73	1	2	Rigid
3MJ9	8.22	5.11	0.02	0.13	0	0	Rigid
3MXW	12.45	11.22	0	0	0	0	Rigid
3P57	12.61	1.85	0	0.96	0	2	Rigid
3PC8	1.41	1.32	1	1	2	2	Rigid
3RVW	11.04	5.64	0	0.14	0	0	Rigid
3SE8	2.58	2.61	0.62	0.62	1	1	Rigid
3SGQ	1.56	1.54	0.83	0.83	2	2	Rigid
3U7Y	2.17	2.07	0.86	0.89	1	1	Rigid
3VLB	1.13	0.98	0.87	0.9	2	3	Rigid
3WD5	11.37	11.59	0	0	0	0	Rigid
4CPA	2.07	1.96	0.56	0.69	1	2	Rigid
4DN4	12.22	12.14	0	0	0	0	Rigid
4FP8	15.8	5.92	0	0.17	0	0	Rigid
4FQI	18.79	18.38	0	0	0	0	Rigid
4G6J	11.68	3.36	0	0.25	0	1	Rigid
4G6M	7.13	3.01	0.03	0.27	0	1	Rigid
4GXU	18.48	18.34	0	0	0	0	Rigid
4H03	2.13	2.01	0.43	0.64	1	1	Rigid
4HX3	15.67	15.51	0	0	0	0	Rigid
4M5Z	1.16	1.4	0.88	0.84	2	2	Rigid
4M76	19.94	4.24	0	0.15	0	0	Rigid
4Y7M	4.94	3.8	0.24	0.34	0	1	Rigid
5GRJ	13.59	3.6	0.04	0.35	0	1	Rigid
5JMO	15.48	5.05	0	0.14	0	0	Rigid
5O14	18.13	3.8	0	0.17	0	1	Rigid
5O1R	1.24	1.18	0.86	0.9	2	2	Rigid
5SV3	1.29	1.26	0.89	0.92	2	2	Rigid
5WK3	14.82	8.13	0	0.04	0	0	Rigid
5WUX	11.25	4.51	0	0.31	0	0	Rigid
5X0T	1.27	1.32	0.94	0.89	2	2	Rigid
5Y9J	7.09	2.76	0.07	0.42	0	1	Rigid
6A77	1.99	1.9	0.61	0.66	2	2	Rigid
6B0S	1.65	1.55	0.8	0.84	2	2	Rigid
6BPC	4.08	3.67	0.09	0.14	0	1	Rigid
6CWG	2.98	1.74	0.5	0.73	1	2	Rigid
6DBG	9.28	2.9	0	0.32	0	1	Rigid
6OC3	13.41	4.32	0.04	0.17	0	0	Rigid
7CEI	1.26	1.33	0.85	0.93	2	2	Rigid
